# Supplementary material
Source: PubMed Central journal article supplement (PMC3665409)
Supplement: NIHMS448221-supplement-Supporting_Information.pdf [file NIHMS448221-supplement-Supporting_Information.pdf]

## Supporting Information

© Copyright Wiley-VCH Verlag GmbH & Co. KGaA, 69451 Weinheim, 2011

### ***N*-Methyl-Substituted Fluorescent DAG–Indololactone Isomers Exhibit Dramatic Differences in Membrane Interactions and Biological Activity**

Noga Gal,<sup>[a]</sup> Sofiya Kolusheva,<sup>[a]</sup> Noemi Kedei,<sup>[b]</sup> Andrea Telek,<sup>[b]</sup> Taiyabah A. Naeem,<sup>[b]</sup> Nancy E. Lewin,<sup>[b]</sup> Langston Lim,<sup>[c]</sup> Poonam Mannan,<sup>[c]</sup> Susan H. Garfield,<sup>[c]</sup> Saïd El Kazzouli,<sup>[d, e]</sup> Dina M. Sigano,<sup>[d]</sup> Victor E. Marquez,<sup>[d]</sup> Peter M. Blumberg,<sup>[b]</sup> and Raz Jelinek\*<sup>[a]</sup>

cbic\_201100246\_sm\_miscellaneous\_information.pdf

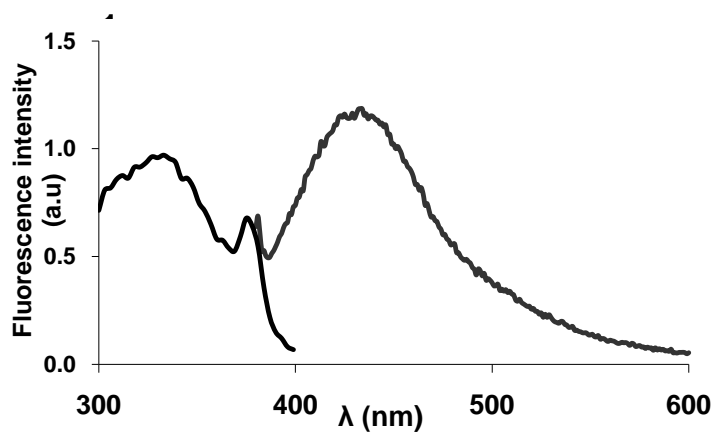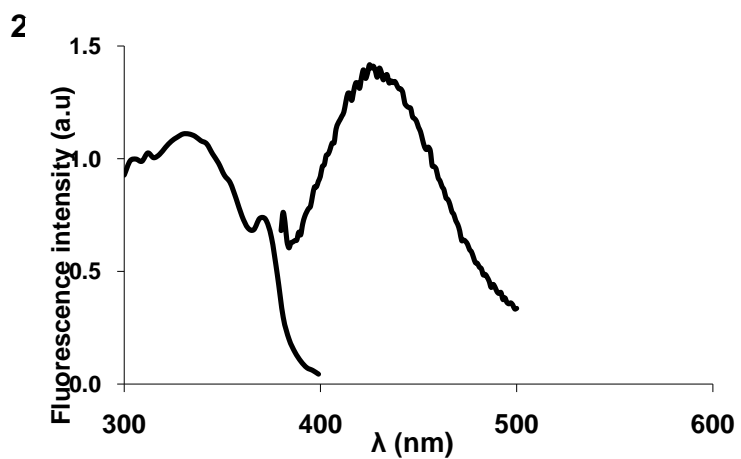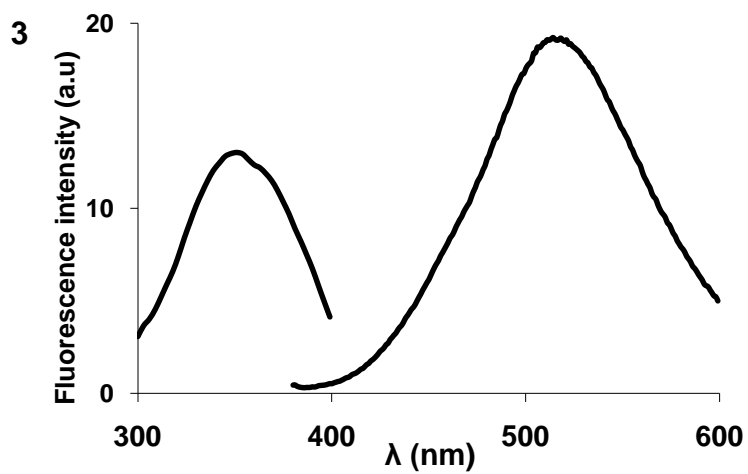

**Figure 1,SI: Excitation spectra (left) and emission spectra (right) of the DAG-indololactones (dissolved in water).**

**1**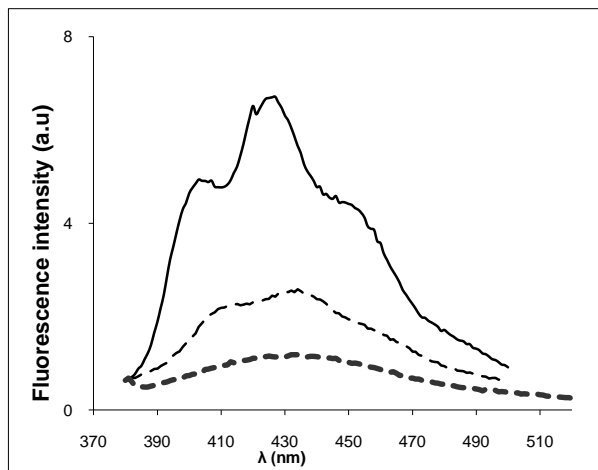**2**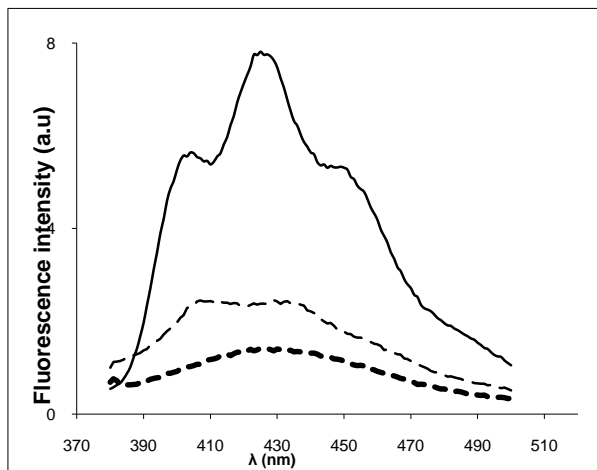**3**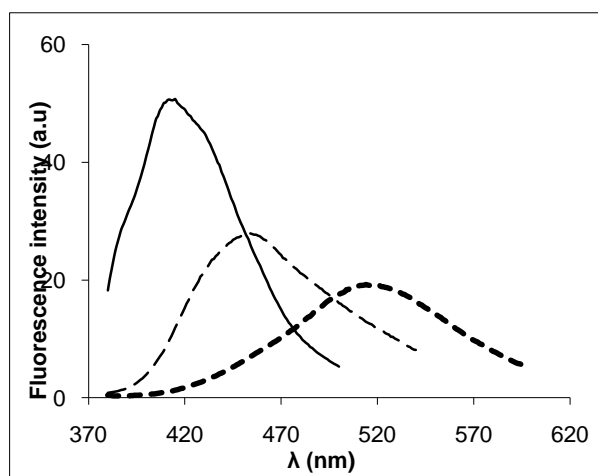

**Figure 2,SI: Dependence of DAG-indololactone fluorescence emission upon solvent polarity. Short dash: water; long dash: ethanol; solid line: n-hexane.**

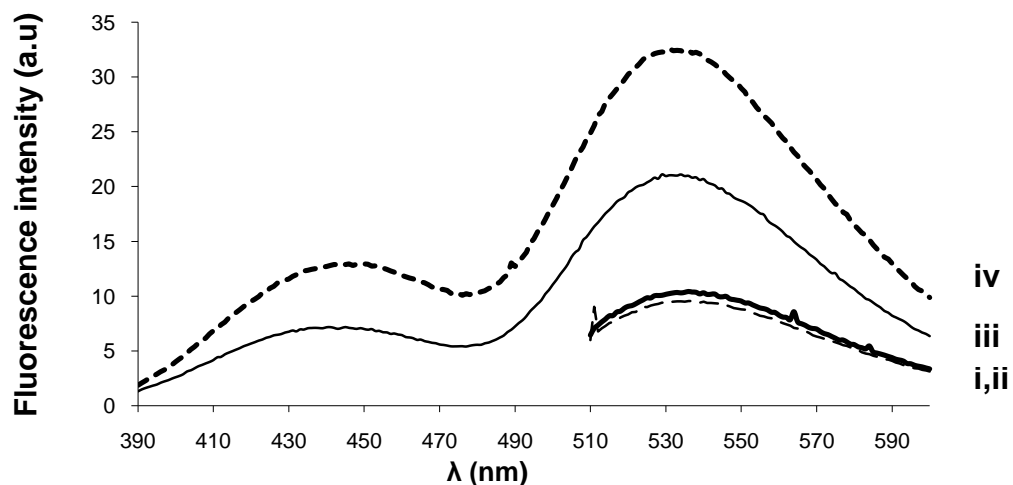

**Figure 3,SI: Fluorescence energy transfer from 3 to NBD-PE.** Fluorescence emission spectra of NBD-PE/PC (1:100 mole ratio) vesicles incubated with **3**. The spectra were acquired using two different excitation wavelengths: 330 nm (excitation of **3**), and 469 nm (excitation of NBD-PE). **i** – excitation at 469 nm, low concentration of **3** (40  $\mu\text{m}$ ); **ii** - excitation at 469 nm, high concentration of **3** (190  $\mu\text{m}$ ); **iii** - excitation at 330 nm, low concentration of **3** (40  $\mu\text{m}$ ); **iv** - excitation at 330 nm, high concentration of **3** (190  $\mu\text{m}$ ).
